# Supplementary material for: Negative effects of divalent mineral cations on the bioaccessibility of carotenoids from plant food matrices and related physical properties of gastro-intestinal fluids
Source: Royal Society of Chemistry journal article supplement (doi:10.1039/c6fo01708h), 2017-01-01
Supplement: c6fo01708h1.pdf [file c6fo01708h1.pdf]

Supplementary Table I – Average bioaccessibility (%)<sup>†</sup> of carotenoids from different food matrices digested with divalent minerals at varying concentrations\*. Results represent mean ± SD (n =4).

| Calcium (mg/L)   |                    | 0            | 250          | 500          | 1000         |
|------------------|--------------------|--------------|--------------|--------------|--------------|
| Tomato Juice     |                    |              |              |              |              |
|                  | <i>β-carotene</i>  | 6.00 ± 0.57  | 8.23 ± 0.30  | 2.09 ± 0.10  | 0.00 ± 0.00  |
|                  | <i>Lutein</i>      | 71.61 ± 1.15 | 50.41 ± 2.96 | 18.19 ± 1.09 | 0.00 ± 0.00  |
|                  | <i>Lycopene</i>    | 1.47 ± 0.03  | 1.17 ± 0.06  | 0.22 ± 0.03  | 0.00 ± 0.00  |
|                  | <i>Phytoene</i>    | 47.56 ± 3.36 | 56.14 ± 3.95 | 16.05 ± 0.82 | 0.00 ± 0.00  |
|                  | <i>Phytofluene</i> | 40.23 ± 2.36 | 49.09 ± 2.60 | 13.47 ± 0.91 | 0.00 ± 0.00  |
| Carrot Juice     |                    |              |              |              |              |
|                  | <i>β-carotene</i>  | 5.81 ± 0.58  | 11.41 ± 0.16 | 6.83 ± 0.06  | 0.051 ± 0.09 |
|                  | <i>α-carotene</i>  | 14.64 ± 3.05 | 31.33 ± 0.40 | 23.33 ± 0.39 | 1.57 ± 0.26  |
|                  | <i>Lutein</i>      | 82.72 ± 3.90 | 82.95 ± 1.90 | 83.45 ± 1.81 | 11.00 ± 0.37 |
|                  | <i>Phytoene</i>    | 21.06 ± 5.27 | 57.76 ± 2.12 | 52.46 ± 1.77 | 0.00 ± 0.00  |
|                  | <i>Phytofluene</i> | 18.51 ± 4.45 | 49.79 ± 1.01 | 50.44 ± 1.12 | 0.00 ± 0.00  |
| Apricot Nectar   |                    |              |              |              |              |
|                  | <i>β-carotene</i>  | 6.62 ± 0.28  | 12.07 ± 0.31 | 7.08 ± 0.33  | 0.00 ± 0.00  |
|                  | <i>Phytoene</i>    | 46.77 ± 4.70 | 63.87 ± 2.57 | 38.36 ± 2.46 | 0.00 ± 0.00  |
|                  | <i>Phytofluene</i> | 46.86 ± 1.54 | 63.92 ± 2.03 | 37.34 ± 0.65 | 0.00 ± 0.00  |
| Spinach          |                    |              |              |              |              |
|                  | <i>β-carotene</i>  | 10.76 ± 0.12 | 6.22 ± 1.37  | 0.00 ± 0.00  | 0.00 ± 0.00  |
|                  | <i>Lutein</i>      | 13.92 ± 0.21 | 6.94 ± 1.13  | 0.07 ± 0.00  | 0.00 ± 0.00  |
|                  | <i>Neoxanthin</i>  | 21.38 ± 0.39 | 13.79 ± 0.68 | 0.17 ± 0.01  | 0.00 ± 0.00  |
| Field Salad      |                    |              |              |              |              |
|                  | <i>β-carotene</i>  | 6.05 ± 0.30  | 6.40 ± 0.14  | 0.89 ± 0.06  | 0.00 ± 0.00  |
|                  | <i>Lutein</i>      | 6.36 ± 0.10  | 7.17 ± 0.27  | 1.38 ± 0.07  | 0.00 ± 0.00  |
|                  | <i>Neoxanthin</i>  | 4.65 ± 0.28  | 5.83 ± 0.21  | 1.23 ± 0.06  | 0.00 ± 0.00  |
| Magnesium (mg/L) |                    | 0            | 100          | 200          | 300          |
| Tomato Juice     |                    |              |              |              |              |
|                  | <i>β-carotene</i>  | 15.03 ± 1.35 | 11.17 ± 0.68 | 5.56 ± 0.05  | 0.00 ± 0.00  |
|                  | <i>Lutein</i>      | 92.50 ± 6.15 | 69.50 ± 0.98 | 37.68 ± 3.99 | 0.00 ± 0.00  |
|                  | <i>Lycopene</i>    | 5.09 ± 0.54  | 3.40 ± 0.14  | 1.13 ± 0.02  | 0.00 ± 0.00  |
|                  | <i>Phytoene</i>    | 59.06 ± 4.02 | 46.56 ± 1.24 | 24.29 ± 2.44 | 0.94 ± 0.21  |
|                  | <i>Phytofluene</i> | 73.05 ± 6.32 | 57.55 ± 1.08 | 27.64 ± 1.93 | 2.16 ± 0.06  |
| Carrot Juice     |                    |              |              |              |              |
|                  | <i>β-carotene</i>  | 17.69 ± 2.21 | 19.62 ± 0.40 | 4.66 ± 0.56  | 0.00 ± 0.00  |
|                  | <i>α-carotene</i>  | 26.43 ± 3.52 | 32.46 ± 0.65 | 9.99 ± 1.85  | 0.00 ± 0.00  |
|                  | <i>Lutein</i>      | 60.71 ± 3.12 | 60.57 ± 1.71 | 24.42 ± 0.21 | 0.00 ± 0.00  |
|                  | <i>Phytoene</i>    | 27.06 ± 3.99 | 35.70 ± 1.19 | 13.45 ± 0.54 | 0.00 ± 0.00  |
|                  | <i>Phytofluene</i> | 39.44 ± 2.85 | 51.88 ± 0.28 | 16.57 ± 1.12 | 0.00 ± 0.00  |
| Apricot Nectar   |                    |              |              |              |              |
|                  | <i>β-carotene</i>  | 20.00 ± 0.84 | 2.95 ± 0.20  | 0.00 ± 0.00  | 0.00 ± 0.00  |
|                  | <i>Phytoene</i>    | 46.94 ± 2.99 | 3.64 ± 4.21  | 0.00 ± 0.00  | 0.00 ± 0.00  |
|                  | <i>Phytofluene</i> | 54.44 ± 4.04 | 0.00 ± 0.00  | 0.00 ± 0.00  | 0.00 ± 0.00  |
| Spinach          |                    |              |              |              |              |
|                  | <i>β-carotene</i>  | 9.81 ± 1.16  | 10.28 ± 0.89 | 10.88 ± 0.06 | 7.87 ± 0.13  |

|             |                   |              |              |              |             |
|-------------|-------------------|--------------|--------------|--------------|-------------|
|             | <i>Lutein</i>     | 9.19 ± 0.62  | 8.24 ± 0.78  | 9.13 ± 0.03  | 5.93 ± 0.08 |
|             | <i>Neoxanthin</i> | 16.05 ± 1.13 | 13.63 ± 1.25 | 14.90 ± 0.14 | 9.70 ± 0.91 |
| Field Salad |                   |              |              |              |             |
|             | <i>β-carotene</i> | 29.43 ± 1.90 | 20.37 ± 0.46 | 6.90 ± 0.95  | 0.00 ± 0.00 |
|             | <i>Lutein</i>     | 26.16 ± 1.89 | 16.61 ± 0.43 | 6.84 ± 1.05  | 0.88 ± 0.06 |
|             | <i>Neoxanthin</i> | 23.93 ± 1.18 | 15.85 ± 0.68 | 7.15 ± 0.83  | 1.41 ± 0.08 |

| Zinc (mg/L)    |                    | 0            | 12.5         | 25           | 50           | 100          | 200          |
|----------------|--------------------|--------------|--------------|--------------|--------------|--------------|--------------|
| Tomato Juice   |                    |              |              |              |              |              |              |
|                | <i>β-carotene</i>  | 15.00 ± 0.55 | 14.32 ± 0.13 | 15.19 ± 0.91 | 14.05 ± 0.18 | 11.77 ± 0.37 | 9.51 ± 0.65  |
|                | <i>Lutein</i>      | 95.42 ± 3.52 | 89.28 ± 0.76 | 92.09 ± 0.25 | 85.97 ± 2.51 | 69.99 ± 1.56 | 58.90 ± 1.26 |
|                | <i>Lycopene</i>    | 4.16 ± 0.33  | 3.90 ± 0.33  | 3.84 ± 0.20  | 3.43 ± 0.18  | 2.71 ± 0.14  | 3.13 ± 1.03  |
|                | <i>Phytoene</i>    | 62.09 ± 2.41 | 59.16 ± 0.39 | 65.00 ± 1.54 | 57.79 ± 0.74 | 49.23 ± 0.56 | 38.38 ± 1.65 |
|                | <i>Phytofluene</i> | 77.74 ± 8.67 | 78.55 ± 0.60 | 80.90 ± 3.38 | 72.88 ± 1.82 | 62.60 ± 0.95 | 47.42 ± 0.80 |
| Carrot Juice   |                    |              |              |              |              |              |              |
|                | <i>β-carotene</i>  | 13.13 ± 1.55 | 15.41 ± 0.32 | 15.88 ± 0.57 | 16.83 ± 0.34 | 12.39 ± 0.41 | 7.48 ± 0.44  |
|                | <i>α-carotene</i>  | 23.70 ± 2.34 | 28.63 ± 2.63 | 29.50 ± 1.03 | 31.10 ± 0.59 | 22.79 ± 0.92 | 15.87 ± 1.49 |
|                | <i>Lutein</i>      | 88.41 ± 5.42 | 81.62 ± 2.70 | 80.97 ± 0.18 | 76.02 ± 0.86 | 68.40 ± 0.62 | 54.74 ± 2.51 |
|                | <i>Phytoene</i>    | 31.23 ± 2.55 | 36.23 ± 3.94 | 36.81 ± 2.10 | 38.12 ± 2.31 | 28.76 ± 1.18 | 22.74 ± 1.62 |
|                | <i>Phytofluene</i> | 52.50 ± 4.63 | 59.42 ± 5.53 | 62.47 ± 1.15 | 64.99 ± 1.83 | 45.43 ± 1.40 | 35.33 ± 1.53 |
| Apricot Nectar |                    |              |              |              |              |              |              |
|                | <i>β-carotene</i>  | 20.93 ± 0.37 | 19.82 ± 2.26 | 17.84 ± 0.93 | 16.28 ± 1.78 | 12.59 ± 1.06 | 0.00 ± 0.00  |
|                | <i>Phytoene</i>    | 22.65 ± 1.32 | 20.47 ± 1.64 | 18.40 ± 2.26 | 15.95 ± 0.85 | 10.99 ± 2.71 | 0.00 ± 0.00  |
|                | <i>Phytofluene</i> | 12.55 ± 0.72 | 11.42 ± 0.90 | 10.23 ± 1.21 | 8.90 ± 0.44  | 5.47 ± 0.78  | 0.00 ± 0.00  |
| Spinach        |                    |              |              |              |              |              |              |
|                | <i>β-carotene</i>  | 4.37 ± 0.55  | 5.68 ± 0.66  | 6.90 ± 0.45  | 7.11 ± 0.32  | 7.66 ± 0.30  | 7.02 ± 0.11  |
|                | <i>Lutein</i>      | 5.98 ± 1.05  | 6.76 ± 0.59  | 6.19 ± 0.27  | 6.14 ± 0.83  | 7.17 ± 0.10  | 6.60 ± 0.45  |
|                | <i>Neoxanthin</i>  | 8.84 ± 1.17  | 10.20 ± 0.92 | 8.76 ± 0.54  | 9.10 ± 1.37  | 10.52 ± 0.56 | 10.12 ± 0.69 |
| Field Salad    |                    |              |              |              |              |              |              |
|                | <i>β-carotene</i>  | 16.58 ± 1.20 | 24.42 ± 2.66 | 27.71 ± 3.89 | 30.53 ± 0.74 | 28.36 ± 0.67 | 24.27 ± 0.28 |
|                | <i>Lutein</i>      | 16.35 ± 0.71 | 22.36 ± 1.72 | 25.86 ± 3.20 | 24.06 ± 0.77 | 22.53 ± 0.92 | 18.90 ± 0.28 |
|                | <i>Neoxanthin</i>  | 14.73 ± 1.98 | 15.66 ± 0.81 | 19.69 ± 1.88 | 19.92 ± 0.42 | 18.05 ± 0.18 | 17.32 ± 0.09 |

| Sodium (mg/L)  |                    | 0             | 375          | 750          | 1500         |
|----------------|--------------------|---------------|--------------|--------------|--------------|
| Tomato Juice   |                    |               |              |              |              |
|                | <i>β-carotene</i>  | 4.03 ± 1.86   | 5.07 ± 1.17  | 6.83 ± 0.42  | 8.42 ± 0.93  |
|                | <i>Lutein</i>      | 58.99 ± 0.96  | 56.46 ± 3.27 | 61.63 ± 1.95 | 70.14 ± 7.94 |
|                | <i>Lycopene</i>    | 1.07 ± 0.59   | 1.58 ± 0.38  | 1.82 ± 0.08  | 2.00 ± 0.41  |
|                | <i>Phytoene</i>    | 28.96 ± 11.10 | 37.42 ± 8.22 | 49.37 ± 308  | 63.40 ± 8.50 |
|                | <i>Phytofluene</i> | 23.19 ± 9.64  | 29.20 ± 5.90 | 38.79 ± 3.79 | 57.60 ± 4.44 |
| Carrot Juice   |                    |               |              |              |              |
|                | <i>β-carotene</i>  | 3.98 ± 0.26   | 4.96 ± 0.97  | 6.89 ± 0.27  | 12.76 ± 2.87 |
|                | <i>α-carotene</i>  | 8.61 ± 0.57   | 10.86 ± 2.09 | 16.15 ± 1.39 | 28.98 ± 6.51 |
|                | <i>Lutein</i>      | 74.96 ± 0.36  | 77.33 ± 6.55 | 89.00 ± 9.29 | 92.93 ± 3.02 |
|                | <i>Phytoene</i>    | 12.50 ± 0.77  | 15.51 ± 2.14 | 22.78 ± 1.66 | 41.84 ± 3.55 |
|                | <i>Phytofluene</i> | 8.01 ± 0.84   | 9.94 ± 1.40  | 15.01 ± 0.79 | 26.10 ± 5.22 |
| Apricot Nectar |                    |               |              |              |              |
|                | <i>β-carotene</i>  | 9.77 ± 0.21   | 10.27 ± 0.26 | 11.27 ± 0.28 | 11.36 ± 0.49 |

|             |                    |              |              |              |              |
|-------------|--------------------|--------------|--------------|--------------|--------------|
|             | <i>Phytoene</i>    | 67.25 ± 0.76 | 74.33 ± 2.17 | 84.96 ± 2.18 | 88.36 ± 3.81 |
|             | <i>Phytofluene</i> | 65.08 ± 2.66 | 66.77 ± 1.52 | 81.30 ± 1.37 | 80.70 ± 6.34 |
| Spinach     |                    |              |              |              |              |
|             | <i>β-carotene</i>  | 8.13 ± 1.16  | 7.46 ± 0.46  | 7.13 ± 1.11  | 8.22 ± 0.96  |
|             | <i>Lutein</i>      | 11.37 ± 0.27 | 10.47 ± 0.82 | 12.03 ± 1.50 | 10.87 ± 0.68 |
|             | <i>Neoxanthin</i>  | 16.98 ± 0.53 | 16.82 ± 0.79 | 15.69 ± 0.51 | 16.14 ± 0.46 |
| Field Salad |                    |              |              |              |              |
|             | <i>β-carotene</i>  | 7.81 ± 0.30  | 10.27 ± 0.21 | 7.02 ± 1.17  | 7.00 ± 0.23  |
|             | <i>Lutein</i>      | 8.09 ± 0.05  | 8.43 ± 0.13  | 6.25 ± .23   | 5.68 ± 0.09  |
|             | <i>Neoxanthin</i>  | 6.55 ± 0.13  | 6.67 ± 0.33  | 5.16 ± 0.36  | 4.28 ± 0.11  |

\*Concentrations given in final digestion stage (small intestine)

\*Bioaccessibility expressed as percentage of originally present carotenoids before digestion
